# Supplementary material for: Soot-PCF: Pore condensation and freezing framework for sootaggregates
Source: Copernicus journal article supplement (doi:10.5194/acp-2020-1134), 2020-11-25
Supplement: Supplementary file [file acp-2020-1134-AC2-supplement.pdf]

### Responses to Anonymous Referee #3

The authors present an extensive theoretical framework to describe the heterogeneous ice nucleation ability of soot particles at cirrus conditions based on the pore condensation and freezing (PCF) mechanism. They provide a very careful analysis of the dependence of the individual steps of the PCF process, i.e., capillary condensation of water, homogeneous freezing of the “water pockets”, and ice growth out of the pores, on the geometry of the pore types that can typically occur in soot aggregates and on the soot-water contact angle. The pore geometries were modelled/calculated based on primary particle size and particle overlap. Overall, the analysis provides some very nice insights into the pathway of forming macroscopic ice crystals on an “active site” on the soot surface, which can be limited, depending on the pore size and geometry, either by capillary condensation or ice growth out of the pore (see analysis of Fig. 5).

*We thank the reviewer for the detailed assessment of our manuscript and his/her constructive comments that we address below point by point (responses are blue and in italic).*

- 1) The approach is also useful to estimate the particles’ susceptibility to pre-activation (see Sect. 7). One point of criticism for me is the in some aspects somewhat limited discussion of the new parameterization introduced in Eq. (9). The authors present a rigorous mathematical treatment of the various steps in the PCF mechanism, but the motivation for choosing the specific formula to quantify the ice-active fraction in Eq. (9) is much less described. Also, the authors state that the parameterization can predict the ice activity of a soot sample (line 853) and that the active-site probability function can be derived from first principles (line 705), but in the end they just use in their current work some empirical formula to derive the active site probability function from fits to activated fractions measured for two soot types in a continuous flow diffusion chamber (Eq. E4 and E5).

*In order to address this comment, we have significantly expanded the description and derivation of Eq. 9. Specifically, we have added the following text to Appendix E:*

*“To predict soot-PCF, we have developed an equation that quantifies the ice active fraction as a function of RH based on the combined probability  $P_N(RH)$ , that  $n$ -membered ring pores nucleate ice at a given RH on the one hand and the probability that a soot aggregate contains such a ring pore on the other hand. By splitting up the ice nucleation probability into two parts, we define a probability function  $P_N(RH)$  that depends on the properties of a single ring pore, namely the primary particle size, overlap and contact angle, and apply it then to aggregates of different size, compaction and number of (equally-sized) primary particles. In other words,  $P_N(RH)$  defines the probability per (single) primary particle to be part of a ring-pore structure.*

*To calculate the probability that an aggregate contains a ring pore, we start by calculating the complementary probability, namely that an aggregate made of  $N_p$  primary particles does not contain any primary particle belonging to a ring pore, i.e.  $(1 - P_N(RH))^{N_p}$ . However, it is important to consider that at least three (four) primary particles are needed to form a three-membered (four-membered) ring pore. Therefore, this probability, needs to be decreased such that three and four primary particles just have one option to form a three-membered and four-membered ring pore, respectively, leading to  $(1 - P_N(RH))^{N_p - n_m}$ , where  $n_m = 2$  in the case of three-membered ring pores and  $n_m = 3$  in the case of four-membered ring pores. If both, three-membered and four-membered ring pores are present on an aggregate, the use of  $n_m = 2$  is advised, to avoid underrepresentation of ring pores in small aggregates.*

*This probability would be valid for ring pores occurring on a string or chain-like structure (1D) of primary particles. If instead primary particles cover an area (2D) or fill a volume (3D), a primary particle has more neighbouring primary particles with which it can form a ring pore. We account for these multiple options by potentiating the probability by the fractal dimension  $D_f$ , ranging from values of 1 for chain-like structures to 3 for perfectly spherical soot aggregates. Taken altogether, the activated fraction is then given as:*

$$AF(RH) = 1 - (1 - P_N(RH))^{((N_p - n_m)^{D_f})}. \quad (E1)$$

*The fractal dimension determines the spacing between the AF-curves of soot aggregates with*

different mobility diameters. Since experimental derivation of the true three-dimensional fractal dimension is challenging and associated with uncertainties or just derived from two dimensional TEM images (see Sect. 2.3),  $D_f$  can also be used as a fit parameter to adjust modelled AF curves to measurements for aggregates of different (mobility) sizes.

For Soot-PCF as described in Eq. (E1), macroscopic ice formation is determined by the processes of pore filling or ice growth out of the pore, which both occur deterministically at a critical RH. Only at temperatures around 230 K, where the homogeneous ice nucleation rates may be critical, the stochastic nature of ice nucleation can be relevant. Therefore, vertical velocity, which is a determining factor for the number of homogeneously nucleated ice crystals (Hoyle et al., 2005; Kärcher and Lohmann, 2002; Sullivan et al., 2016) (Kärcher and Lohmann, 2002; Hoyle et al., 2005; Sullivan et al., 2016), does not influence the number of ice crystals nucleated through soot-PCF and can be neglected in the soot-PCF framework. It should further be noted that the function  $P_N(RH)$  can either be used to bring  $AF(RH)$  in agreement with an experimental dataset or can be derived from soot properties by inspecting the different onset RH required to nucleate and grow ice out of ring pores, as shown in Appendix D. Note that within aggregates, there may be structures that are not fully closed to form ring pores. Such structures that can be viewed as ring pores with negative overlap may close to form effective ring pores during humidity cycles and cloud processing driven by capillary forces arising during condensation and evaporation (e.g. Huang et al., 1994; Ma et al., 2013). Such an increase in the pore number density would come in addition to the one expected by an increase in  $D_f$  and require an adaptation of  $P_N(RH)$ .”

- 2) Furthermore, it is mentioned that the new approach has advantages over previously proposed parameterizations, but no comparison with other literature data is shown in Fig. 6.

We believe that our soot-PCF parameterization is more elaborated than parameterizations commonly used in global models, which often treat ice nucleation on soot particles in a simplistic manner. To clarify this aspect, we added the following text to our manuscript in order to compare with ice nucleation parameterizations that are frequently used in global climate models as suggested by the reviewer:

“The way current parameterizations in global climate models predict the ice nucleation activity of soot particles are hampered by a number of factors. Most importantly, they often do not include a size dependence, but simplistically assume a fixed percentage of ice active soot particles ranging from 1 to 100 % with ice activation occurring at one distinct  $RH_i$  level (Gettelman et al., 2012; Gettelman and Chen, 2013; e.g. Hendricks et al., 2005; Penner et al., 2009; Wang and Penner, 2010; Zhou and Penner, 2014). While accounting for soot aggregate size is indispensable to correctly estimate the number of primary particles and pores present that ultimately determine the ice nucleation activity, explicitly measuring the size- and relative humidity dependent ice nucleation activity as a function of  $RH_i$  has only been the focus of a limited number of studies to date. Recently, Lohmann et al. (2020) used a more realistic parameterization derived from the ice nucleation activity of 400 nm miniCAST black soot aggregates, measured at 233 K and 218 K, with AF being a function of  $RH_i$  but still independent of aggregate size. Moreover, Zhou and Penner (2014) and Lohmann et al. (2020) assumed that soot particles are rendered inactive over time upon acquiring a coating of three or one monolayer, respectively. Compared to these parameterizations soot-PCF denotes a key step forward as it comprehensively reflects the strong size and relative humidity dependence of ice nucleation on soot aggregates and can be adapted to specific soot properties.”

If these points are explained a little better, I will be very happy to accept the manuscript for publication in ACP.

Specific comments:

- 3) Line 75-77: Could you incorporate these literature data to Fig. 6 to compare them with the Mahrt et al. data?

We have added a new appendix that summarizes previous literature on ice nucleation of soot

particles in the cirrus regime and have also included an additional overview figure into the introduction of our revised manuscript (see Fig. 1). Please directly see the new Appendix F. We do, however, not see a benefit in incorporating more data into Fig. 6, since the lines shown in Fig. 6 denote ice nucleation predicted by our soot-PCF parameterization (Eq. 9) considering the specific properties of the specific soot types shown in this figure.

Please note that in order to compare the ice nucleation activity predicted by the soot-PCF parameterization to that measured in previous studies, measured size-dependent ice activated fractions along with a characterization of the particle properties (e.g. primary particle size) would be desirable. Comparison is indeed limited by the lack of such data, as many studies only report onset conditions in terms of RH and T, for a certain AF that is reached. To address this issue, we have added the following statement:

*“While accounting for soot aggregate size is indispensable to correctly estimate the number of primary particles and pores present that ultimately determine the ice nucleation activity, explicitly measuring the size- and relative humidity-dependent ice nucleation activity has only been the focus of a limited number of studies to date.”*

Furthermore, we address this issue in the outlook:

*“Such studies should take great care in characterizing the physical and chemical properties of the soot particles, in particular those discussed herein, which will be essential to further validate the soot-PCF framework. We re-iterate that there is a clear need for dedicated ice nucleation studies on size-selected soot particles, also for aggregate sizes with (mobility) diameters below 100 nm, as well as studies exploring the impact of semi-volatile coatings on the ice nucleation ability of these particles. Lastly, we underscore the importance to report full ice activation spectra, rather than only ice nucleation onset conditions, to further improve our understanding of the physical principles determining the ice nucleation by soot particles and thereby better predict their effects on clouds and climate.”*

- 4) Line 86: You specifically mention here “hydrophobic material” to suppress PCF. But wouldn't the same be true for water-soluble components like sulfates, because solutes would decrease the homogeneous freezing temperature compared to pure water?

*The reviewer raises a good point and is right that dissolved water-soluble components decrease the freezing temperature. This effect will be relevant in the temperature range close to the homogeneous ice nucleation threshold of aqueous solution droplets. Moreover, large amounts of hydrophilic material will shift the freezing mode from soot-PCF to immersion freezing or homogeneous ice nucleation of solution droplets. We discuss these aspects in more detail in the revised manuscript in Sect. 9. Please see our changes directly within Sect. 9 and our answer to comment 2 of reviewer 2.*

- 5) Line 116: You state here that you “predict” the ice nucleation ability of soot particles which then “fits” experimental results – but in the end with Eq. E4 and E5 you use empirical formulas to derive the active site probability function from the experiments. So currently it is still more the development of a new framework, by which the experimental data should be fitted, than an a priori prediction of the ice nucleation ability of a soot sample.

*Indeed, here we use  $P_N(RH)$  to fit the experimental data. However, in the absence of experimental data the freezing onset for a given contact angle can be estimated based on the soot properties. We added a paragraph outlining how the parameterization can be derived based on soot properties to the revised manuscript:*

*“Soot-PCF parameterizations in the form of Eq. (9) can be derived from first principles using activation curves as the ones shown in Appendix D, presuming a contact angle combined with characteristic distributions of primary particle sizes and overlap coefficients. Weighting the ice activation RH for each combination of primary particle size and overlap coefficient with its occurrence probability leads to an ice activation probability distribution as a function of RH. If PCF is water*

*condensation limited, the parameterization should be formulated based on  $RH_w$ , if it is ice growth limited, it should be with respect to  $RH_i$ . Moreover, the temperature below which PCF becomes active needs to be defined. Assuming that soot is not ice active in immersion freezing mode, this threshold temperature depends on the increase of the homogeneous ice nucleation rate with decreasing temperature and should be around 230 K, given the small water volumes involved in forming ice via soot-PCF. Yet, more ice nucleation experiments are needed in this temperature range with ice nucleation active soot samples to better constrain this threshold temperature.”*

*In conclusion, while we demonstrate the ability of the soot-PCF framework, by fitting experimental data using Eq. (9), the same framework can also be applied/transferred to other soot particles with different properties, where experimental data is absent. Once the parameters for the soot-PCF parametrization have been derived/estimated, the parametrization can be used within e.g. global climate models to predict the ice nucleation activity of soot particles with given physicochemical properties.*

- 6) Line 120: Given the length of the manuscript and the numerous aspects of the discussion, you might add here a short paragraph describing the general structure of the article.

*This is a good suggestion. We have added a paragraph summarizing the structure of the paper:*

*“The paper is structured as follows: in Sect. 2 we summarize the soot properties that are relevant for PCF and in Sect. 3 we define the pore structures that serve as the basis for the soot-PCF framework developed herein. In Sects. 4–6, we discuss the different steps of soot-PCF, namely ice nucleation (Sect. 4), which is preceded by pore water condensation (Sect. 5) and followed by ice growth out of the pores on the soot aggregates (Sect. 6). Section 7 discusses the relevance of pre-activation for soot-PCF, while Sect. 8 presents a novel parameterization of ice nucleation by soot based on the soot-PCF framework. Atmospheric implications are discussed in Sect. 9 followed by a summary and conclusions in Sect. 10.*

*A detailed derivation of soot-PCF equations can be found in the appendices. Pore geometries are derived in Appendix A, pore filling and ice growth conditions in Appendix B. The derivation of the contact angle between ice and soot is given in Appendix C, while Appendix D features a compilation of different soot-PCF curves for relevant combinations of contact angle, primary particle diameter and overlap. A detailed derivation of the soot-PCF parameterization is given in Appendix E, followed by a compilation of ice nucleation data from previous studies (Appendix F) and a list of symbols (Appendix G).”*

- 7) Line 209: The heading of Sect. 2.3 “promises” some information on “compaction”, but actually I couldn’t find much of it in this section. Given that compaction is indeed an important process which affects the number of pores in a soot aggregate (line 141) and also appears as a parameter (via the fractal dimension) in Eq. 9, I would like to see some more discussion of this, see also my later comment regarding Eq. 9.

*Indeed, our discussion of compaction was incomplete. We therefore extended Sect. 2.3 to include a discussion of compaction and fractal dimension:*

*“The number of equally-sized primary particles contained in a soot aggregate of a given mobility diameter depends on the degree of compaction. Freshly emitted particles are typically fractal-like chain-agglomerates that can become more compact via various aging processes during transport through the atmosphere (Bhandari et al., 2019; China et al., 2015) such as coagulation, condensation of semi-volatile material, heterogeneous reactions, relative humidity changes, and cloud processing (China et al., 2015; Ding et al., 2019; Yuan et al., 2019). To quantify the degree of compaction, TEM or SEM (scanning electron microscopy) images of soot particles can be evaluated with respect to morphological descriptors such as aspect ratio, roundness, convexity or fractal dimension (e.g. Bhandari et al., 2019; China et al., 2015; Mahrt et al., 2020). Such analyses evidence compaction at high RH and collapse after cloud cycling (Colbeck et al., 1990; Huang et al., 2014; Zuberi et al., 2005). Collapse of fractal-like aggregates due to capillary condensation of water has also been reported in HTDMA (Humidified Tandem Differential Mobility Analyzer) measurements, where a decreasing mobility diameter with increasing RH has been observed in*

the case of carbon particles (Weingartner et al., 1997, 1995). Conversely, fresh diesel and jet engine combustion particles exhibit much less restructuring together with hygroscopic growth that becomes more pronounced with increasing sulfur content (Gysel et al., 2003; Weingartner et al., 1997). Compaction has also been observed in field measurements (Bhandari et al., 2019; Ding et al., 2019). For instance soot particles sampled from evaporated cloud droplets, have been found to be significantly more compact than freshly emitted and interstitial soot (Bhandari et al., 2019).

While circularity or aspect ratio of soot aggregates are two-dimensional morphological parameters that provide descriptive measures of compaction, classification via the (three-dimensional) fractal dimension has deeper implications as soot is assumed to be a fractal object. Yet, soot aggregates are not truly fractals because they are not completely scale invariant, but exhibit self-similarity only over a finite range of length scales (Huang et al., 1994; Mandelbrot, 1977). Nonetheless, the concepts of fractal geometry have successfully been used to quantitatively describe their morphology during aggregate growth by agglomeration (Sorensen, 2011). To describe soot aggregates as fractals, the primary particles are assumed to be all of the same size with point contacts between each other (Sorensen, 2011). As a consequence of self-similarity, the number of primary particles scales as a power law with the radius, implying a fractal dimension of 1 for a chain-agglomerate and a fractal dimension of 3 for primary particles ordered as a sphere. Assuming diffusion limited cluster-cluster aggregation, a characteristic fractal dimension for soot aggregates of 1.78 should result, while in case of reaction limited cluster-cluster aggregation the expected fractal dimension is 2.1 (Sorensen, 2011). The (two-dimensional) fractal dimension from TEM images of soot aggregates has been derived by relating the maximum length of soot particles with the number of particles contained in them. While fractal dimensions of loose chain-agglomerates can be well determined with this method, the fractal dimension tends to be underestimated in case of compacted soot aggregates. Therefore, China et al. (2015) resorted to a two-dimensional fractal dimension such that a sphere would be assigned a fractal dimension of 2. Alternatively, the fractal dimension of soot aggregates can be derived by relating the particle mass measured by an aerosol particle mass analyzer (APM) to the electrical mobility diameter from a DMA (Differential Mobility Analyzer) through a power law of the form  $m \propto D_m^{Df}$ , where  $m$  is the mass of a (size selected) soot aggregate (e.g. Schmidt-Ott et al., 1990). Using both methods, Park et al. (2004) obtained fractal dimensions of 1.75 from the analysis of TEM images while relating the soot aggregate mass with its mobility diameter yielded a fractal dimension of 2.35. While the (two-dimensional) TEM analysis probably underestimated the fractal dimension, Sorensen (2011) argued that the interpretation of the exponent as the fractal dimension in the relation of aggregate electrical mobility diameter with aggregate mass is misled in the limit of aggregates containing only few primary particles and results in too high fractal dimensions. Shortcomings in the analysis of two-dimensional projections have been confirmed by electron tomography yielding higher fractal dimensions (Adachi et al., 2007; Baldelli et al., 2019), yet, this method is laborious and not suited to screen a large number of aggregates for a statistical analysis.”

8) Line 264: Isn't it below that of bulk water?

*Thank you for spotting this. It is indeed below that of bulk water. We have corrected this in the revised version.*

9) Line 379: Can you briefly explain in the text what is the parameter “n”?

*We added “n” (as  $n_{it}$ ) to the List of Symbols and Abbreviations (Appendix G) along with an explanation.*

10) Line 590-593: You mention here the relatively large variability of the onset conditions in terms of  $S_{ice}$  with the chosen values for the contact angle, overlap factor, and primary particle size. It would be interesting, see comment above, to compare these onsets with existing literature data on ice nucleation by soot particles.

*We added an additional appendix (Appendix F) containing a table and figure summarizing ice*

*nucleation onsets of soot reported in the literature and compare them with the onsets expected depending on contact angle.*

- 11) Line 703: Is there a “physical basis” behind the equation you used to represent the ice active fraction (Eq. 9), e.g. regarding the exponent defined as  $(N_p - n_m)^{D_f}$ ? Is there a quantitative relationship to describe the number of pores in a soot aggregate as a function of primary particle size and compaction which is reflected by this exponent or was this expression just found to be a suited formulation to represent that the AF increases with  $N_p$  and  $D_f$ ? Lines 1175/1176 state that  $N_p$  and  $D_f$  determine the probability that a soot aggregate contains a ring pore, but line 703 states that the factor  $P_N(RH)$  also is the probability of a primary particle to be part of ring pore with given ice nucleating potential. I am a bit confused by this interpretation, is  $P_N(RH)$  not more of a factor that describes a kind of “averaged” ice nucleation ability of the pores present in the soot aggregate and the exponent  $(N_p - n_m)^{D_f}$  a measure for the absolute number of pores in the aggregate? Maybe you could elaborate a bit more on the physical meaning of these parameters and clarify my potential misconception.

*$P_N(RH)$  defines the probability per (single) primary particle to be part of a ring-pore structure. The exponent,  $(N_p - n_m)^{D_f}$ , takes into account the number of primary particles available within an aggregate to form a ring pore, as well as their spatial/morphological arrangement, via the fractal dimension,  $D_f$ . To clarify the reviewer’s concern, we have added a more detailed discussion of Eq. 9 to Appendix E. Please see our answer to your comment 1.*

- 12) You mention in line 771-774 the very interesting finding from Mahrt et al. that the ice nucleation ability of compacted soot particles was found to be significantly higher compared to unprocessed, more fractal soot. Have you tried to model or even predict this behavior with your new parameterization? This would be in my opinion clear evidence of the advantages of your approach compared to previous parameterizations. Would compaction only affect the parameter  $D_f$  so that one could use the same active-site probability function of a given soot type both before and after compaction? Or would compaction also alter  $P_N(RH)$  (a question which is somehow related to my comment above regarding the physical meaning of the parameters)? Also, is it immediately intuitive that compaction, i.e., a higher  $D_f$ , leads to an increase in the AF? Would compaction not also lead to the situation that some potentially ice-active pores are no longer in the vicinity of the particle surface but somehow “shielded” in the inner part of the particle and can thus no longer contribute to macroscopic ice growth? This also relates to my question above how one can determine the number of pores that are actually accessible to the PCF depending on agglomerate size and compaction.

*The pores that are responsible for soot-PCF are the narrowest within a soot aggregate. Therefore, we consider shielding (due to compaction) as irrelevant to render ring pores within soot particles ice inactive, at least for typical primary particle sizes and the degree of compaction of atmospheric soot particles. If the aggregate is sintered to a degree that shielding becomes relevant or when primary particles are approximately below 10 nm in diameter, the three-membered and four-membered ring pores, as described here, are unlikely to be the relevant pore structures for ice formation via soot-PCF since they require RH conditions for ice formation that are not relevant for typical upper tropospheric conditions (see our Figs. D1 and D2). For such pore structures, compaction may render the openings of the inner cavities too narrow for ice to grow out of them.*

*Furthermore, we feel that compaction of soot aggregates will likely not only affect the fractal dimension, but also the active-site probability function  $P_N(RH)$ , with the latter parameter dominating the impact on soot-PCF (please see our answer to your comments 1 and 11 above). For instance, for a soot particle with a fractal dimension well below 3 that contains open ring-pore structures, a compaction can lead to closure of these ring-pore structure, ultimately allowing such aggregates to become ice active via soot-PCF, while the fractal dimension might only be slightly increased and remains well below 3. As an example, please note that the miniCAST black data from Mahrt et al. (2018) shown in Fig. 6 use a fractal dimension of  $D_f = 1.86$ , but are well described by our soot-PCF (see also Table E2). We emphasize that even in the absence of an experimentally determined fractal dimension, one can either use a fractal dimension of  $D_f = 1.78$ , corresponding*

to the typical fractal dimension of soot particles formed through diffusion limited cluster aggregation (see Appendix E), or use  $D_f$  as a (free) fitting parameter (within the bounds 1–3).

- 13) Line 705: You mention that  $P_n(RH)$  can be computed from first principles for a given soot type. But how would that look in practice – you would have to deal with a large parameter range with respect to primary particle size, overlap factor, and contact angle even for a single soot type, as reviewed in the first chapters of your manuscript, which then also depend on fuel type and operation conditions of the engine?

*We have added the following text to Sect. 8 to make clear how soot-PCF parameterizations can be derived from first principles. Please also see our answer to your comment 5 above.*

*Using this procedure, we have developed a soot-PCF parameterization to describe the ice nucleation activity in a separate study (Kärcher et al., in prep.). In this case, we assumed a fixed, characteristic contact angle and distributions for the overlap coefficient and measured distribution of the primary particle sizes (e.g. Fig. 3 in Liati et al. (2014)). To calculate the number of primary particles within an aggregate of given (electrical mobility) size, we assumed the average primary particle diameter of the measured primary particle size distribution.*

- 14) Line 751-753: You mention here the previously proposed parameterizations. Which are these exactly and can you provide some quantitative comparison with your new parameterization? I assume that in some of the previous parameterizations the activated fraction was normalized to the surface area of the aerosol (soot) particles to yield the so-called ice nucleation active surface site (INAS), whereas your approach specifically considers the number of active sites, i.e., pores in the soot aggregates, which in principle, no doubt, is the better physically-constrained approach. But how big would be the difference? I think it would be an important information for the modelling community to quantify the difference of your new theoretical framework to the widespread INAS approach, and to investigate with your size-resolved ice nucleation measurements and modelling simulations in Fig. 6 whether such an approach that only relies on the overall particle surface area is in accordance with the data or not. With a more quantitative comparison to previous parameterizations, you could really underline the advantages of your approach.

*The reviewer raises a fair question. INAS-based parameterizations are empirical and hence completely rely on the specific datasets that were chosen for a specific parameterization, which may not always be representative for the INP categories (e.g. soot or mineral dust) that should be covered. Therefore, new datasets often require new INAS parameterizations. Our soot-PCF parameterization, on the contrary, only relies on general soot particle properties (overlap, primary particle diameter, contact angle), and can either be adjusted to an experimental dataset, or can be chosen to broadly cover characteristic properties of atmospheric soot particles in the absence of experimental data on ice nucleation.*

*Therefore, we feel that our soot-PCF parameterization is superior to INAS-based parameterizations and indeed has predictive power for atmospheric relevant soot properties.*

*We are aware of just one INAS parameterization of soot in the cirrus regime, namely the one by Ullrich et al. (2017). This parameterization relies on ice nucleation onsets from AIDA campaigns performed with only a few different soot types. It is therefore very specific for the soot samples chosen for the AIDA campaigns and does not necessarily cover the wide variety of atmospheric soot types and their ice nucleation activities. The equation used by Ullrich et al. (2017) for the soot parameterization requires five fitting parameters (see their Eq. 7 and Table 7) that just describe the isolines of the ice nucleation activity, but do not have a deeper physical background. By contrast, the soot-PCF parameterization requires a single fit function,  $P_n(RH)$ , along with information about the (measured) physicochemical particle properties to describe the ice nucleation activity of a soot sample as a function of relative humidity and soot aggregate size as shown in our Fig. 6.*

*We added the following text to specify the advantages of the soot-PCF parameterization compared with INAS parameterizations.*

*“The physical basis of the soot-PCF parameterization permits easy and fast adaptation to different types of atmospherically relevant soot, while parameterizations based on ice nucleation active surface site (INAS) densities are mostly restricted to the data underlying their parameterization. Consequently, INAS-based parameterizations cannot account for the wide diversity of soot types and their ice nucleation activities. Moreover, INAS-based parameterizations, such as the one by Ullrich et al. (2017), assume a scaling of ice nucleation sites with the particle (aggregate) surface area. Yet, the size-resolved measurements displayed in Fig. 6 exemplify that the ice-active particle fraction declines much more strongly with particle diameter than the surface area does. This is even more important considering that laboratory studies often concentrate on soot aggregates with mobility diameters much larger than typically found in the atmosphere (see Sect. 2.3), likely resulting in an overestimation of the effect soot has on cirrus formation. Conversely, the soot-PCF parameterization has a physically constrained size dependence and more importantly assumes pores and not the particle surface area to determine the ice nucleation activity of soot aerosols.”*

15) Line 855: I would rather say your parameterization increases the complexity of the parameters. You emphasize that you need different fit values for each soot type, and instead of just using the overall aerosol surface area as a parameter, you need additional values for the primary particles size and the degree of compaction. Depending on the soot type, you also discriminate between parameterizations with respect to either RHi or RHw (Eq. E4 and E5). This is by no means meant as a criticism of your approach – but my understanding of your study is rather that you need more parameters to characterize the actual ice active sites in the soot agglomerates using a physically-constrained approach so that you can properly describe their ice nucleation ability.

*Please note that the complexity of our soot-PCF parameterization reflects the complexity of soot and allows to explain why different soot types show widely different ice nucleation activity. Having just one soot parameterization for all soot types – while desirable – would neglect this diversity. Furthermore, we highlight that the soot-PCF parameterization just requires two fitting parameters with physical significance compared with e.g. five purely empirical fitting parameters used by the Ullrich et al. (2017) parameterization.*

*However, we acknowledge that future soot ice nucleation studies should more carefully characterize and quantify the physiochemical properties of the soot types investigated, such as primary particle size and fractal dimension. This will ultimately allow to further test the validity of the soot-PCF framework presented here and eventually allow to derive a set of general “average parameters” that can be used within the soot-PCF framework.*

16) Line 871: “may vastly improve” – is a rather strong statement which also requires a more quantitative comparison to previous parameterizations.

*We indeed view the increased physical understanding of ice nucleation by soot thanks to the soot-PCF framework as a vast improvement. Please also see our answers to your comments above. This framework provides guidance in the exploration of the multidimensional parameter space spanned by soot. This allows a more focused planning of future ice nucleation experiments of soot and faster progress of the community to better understand the impacts and consequences of aerosol-cloud interaction of soot particles.*

*Furthermore, application of INAS-based parameterizations within a bulk microphysical scheme requires drastic assumptions and simplifications to derive ice-active soot particle fractions from the active site surface density. Conversely, the soot-PCF framework directly predicts ice-active fractions from measured mobility diameters, thus eliminating conversion bias. Thus, the physically based description of particle size and RH dependence of soot-PCF allows accurate simulation of soot-cirrus interactions in detailed cloud models (Kärcher et al., in prep.).*

17) Line 882: “have used available literature data” – yes, but there are many more previous measurements which you could include in Fig. 6, as suggested above.

*We have chosen the two datasets from Mahrt et al. (2018, 2020) because they cover the whole*



ice activation curve and include more than one particle size. Moreover, the soot types used in these studies have been carefully characterized with respect to fractal dimension and primary particle size, two parameters that are key for the soot-PCF framework. To emphasize the need of carefully characterizing the soot particle properties in future soot ice nucleation experiments, we have added the following:

*“While we have used available literature data to constrain our framework, further experimental exploration is required, in particular on ambient soot particles. Such studies should take great care in characterizing the physical and chemical properties of the soot particles, in particular those discussed herein, which will be essential to further validate the soot-PCF framework. We re-iterate that there is a clear need for dedicated ice nucleation studies on size-selected soot particles, also for aggregate sizes with (mobility) diameters below 100 nm, as well as studies exploring the impact of semi-volatile coatings on the ice nucleation ability of these particles. Lastly, we underscore the importance to report full ice activation spectra, rather than only ice nucleation onset conditions, to further improve our understanding of the physical principles determining the ice nucleation by soot particles and thereby better predict their effects on clouds and climate.”*

*Furthermore, we added an additional table in Appendix F of the revised manuscript that tabulates previous studies of ice nucleation by soot in the cirrus regime.*

18) Line 1004/1005: What is meant here with “example of a pore of 8 nm diameter”? Don’t you calculate the saturation ratios for the whole range of filling levels?

*This statement is erroneous. We correct it in the revised version. Thank you for pointing this out.*

Some technical corrections:

*Thank you for the technical corrections.*

Line 38: Delete “of” before “ice formation”. *Done*

Line 54: “major gaps exist”. *Done*

Line 70: add “freezing”, i.e. condensation/immersion freezing mode. *Done*

Line 187: Maybe add comma after “Overall”. *Done*

Line 267: Delete comma after “graphite”. *Done*

Line 324: Delete comma after “cell”. *Done*

Line 403: “in the immersion freezing mode”. *Done*

Line 546: please add: “growing ice phase out of a three-membered ring pore” *Done*

Line 568/569: You may briefly add here that the point for a filling level of 1.25 nm is indicated by “A” in Fig. 5. *Done*

Line 1077: “randomly” fluctuating. *Done*

#### **References:**

Adachi, K., Chung, S. H., Friedrich, H. and Buseck, P. R.: Fractal parameters of individual soot particles determined using electron tomography: Implications for optical properties, *J Geophys Res-Atmos*, 112(D14), n/a-n/a, <https://doi.org/10.1029/2006jd008296>, 2007.

Baldelli, A., Trivanovic, U. and Rogak, S. N.: Electron tomography of soot for validation of 2D image processing and observation of new structural features, *Aerosol Science and Technology*, 53(5), 575–582, <https://doi.org/10.1080/02786826.2019.1578860>, 2019.

Bhandari, J., China, S., Chandrakar, K. K., Kinney, G., Cantrell, W., Shaw, R. A., Mazzoleni, L. R., Giroto, G., Sharma, N., Gorkowski, K., Gilardoni, S., Decesari, S., Facchini, M. C., Zanca, N., Pavese, G., Esposito, F., Dubey, M. K., Aiken, A. C., Chakrabarty, R. K., Moosmüller, H., Onasch, T. B., Zaveri, R. A., Scarnato, B. V., Fialho, P. and Mazzoleni, C.: Extensive Soot Compaction by

- Cloud Processing from Laboratory and Field Observations, *Scientific Reports*, 9(1), 11824, <https://doi.org/10.1038/s41598-019-48143-y>, 2019.
- China, S., Kulkarni, G., Scarnato, B., V., Sharma, N., Pekour, M., Shilling, J., E., Wilson, J., Zelenyuk, A., Chand, D., Liu, S., C. Aiken, A., Dubey, M. K., Laskin, A., Zaveri, R., A. and Mazzone, C.: Morphology of diesel soot residuals from supercooled water droplets and ice crystals: implications for optical properties, *Environmental Research Letters*, 10(11), 114010, 2015.
- Colbeck, I., Appleby, L., Hardman, E. J. and Harrison, R. M.: The optical properties and morphology of cloud-processed carbonaceous smoke, *Journal of Aerosol Science*, 21(4), 527–538, [https://doi.org/10.1016/0021-8502\(90\)90129-L](https://doi.org/10.1016/0021-8502(90)90129-L), 1990.
- Ding, S., Zhao, D., He, C., Huang, M., He, H., Tian, P., Liu, Q., Bi, K., Yu, C., Pitt, J., Chen, Y., Ma, X., Chen, Y., Jia, X., Kong, S., Wu, J., Hu, D., Hu, K., Ding, D. and Liu, D.: Observed Interactions Between Black Carbon and Hydrometeor During Wet Scavenging in Mixed-Phase Clouds, *Geophysical Research Letters*, 46(14), 8453–8463, <https://doi.org/10.1029/2019GL083171>, 2019.
- Gettelman, A. and Chen, C.: The climate impact of aviation aerosols, *Geophysical Research Letters*, 40(11), 2785–2789, <https://doi.org/10.1002/grl.50520>, 2013.
- Gettelman, A., Liu, X., Barahona, D., Lohmann, U. and Chen, C.: Climate impacts of ice nucleation, *Journal of Geophysical Research-Atmospheres*, 117, <https://doi.org/10.1029/2012jd017950>, 2012.
- Gysel, M., Nyeki, S., Weingartner, E., Baltensperger, U., Giebl, H., Hitzenberger, R., Petzold, A. and Wilson, C. W.: Properties of jet engine combustion particles during the PartEmis experiment: Hygroscopicity at subsaturated conditions, *Geophysical Research Letters*, 30(11), <https://doi.org/10.1029/2003GL016896>, 2003.
- Hendricks, J., Kärcher, B., Lohmann, U. and Ponater, M.: Do aircraft black carbon emissions affect cirrus clouds on the global scale?, *Geophysical Research Letters*, 32(12), <https://doi.org/10.1029/2005GL022740>, 2005.
- Hoyle, C. R., Luo, B. P. and Peter, T.: The Origin of High Ice Crystal Number Densities in Cirrus Clouds, *Journal of the Atmospheric Sciences*, 62(7), 2568–2579, <https://doi.org/10.1175/JAS3487.1>, 2005.
- Huang, P. F., Turpin, B. J., Pihlo, M. J., Kittelson, D. B. and McMurry, P. H.: Effects of water condensation and evaporation on diesel chain-agglomerate morphology, *Journal of Aerosol Science*, 25(3), 447–459, [https://doi.org/10.1016/0021-8502\(94\)90063-9](https://doi.org/10.1016/0021-8502(94)90063-9), 1994.
- Huang, R.-J., Zhang, Y., Bozzetti, C., Ho, K.-F., Cao, J.-J., Han, Y., Daellenbach, K. R., Slowik, J. G., Platt, S. M., Canonaco, F., Zotter, P., Wolf, R., Pieber, S. M., Bruns, E. A., Crippa, M., Ciarelli, G., Piazzalunga, A., Schwikowski, M., Abbaszade, G., Schnelle-Kreis, J., Zimmermann, R., An, Z., Szidat, S., Baltensperger, U., Haddad, I. E. and Prévôt, A. S. H.: High secondary aerosol contribution to particulate pollution during haze events in China, *Nature*, 514(7521), 218–222, <https://doi.org/10.1038/nature13774>, 2014.
- Kärcher, B. and Lohmann, U.: A Parameterization of cirrus cloud formation: Homogeneous freezing including effects of aerosol size, *Journal of Geophysical Research: Atmospheres*, 107(D23), AAC 9-1-AAC 9-10, <https://doi.org/10.1029/2001JD001429>, 2002.
- Kärcher, B., Mahrt, F. and Marcolli, C.: Aircraft soot-cirrus interactions do not matter for the climate impact of aviation, in prep.
- Liati, A., Brem, B. T., Durdina, L., Vögtli, M., Arroyo Rojas Dasilva, Y., Dimopoulos Eggenschwiler,

P. and Wang, J.: Electron Microscopic Study of Soot Particulate Matter Emissions from Aircraft Turbine Engines, *Environmental Science & Technology*, 48(18), 10975–10983, <https://doi.org/10.1021/es501809b>, 2014.

Lohmann, U., Friebel, F., Kanji, Z. A., Mahrt, F., Mensah, A. A. and Neubauer, D.: Future warming exacerbated by aged-soot effect on cloud formation, *Nature Geoscience*, 13(10), 674–680, <https://doi.org/10.1038/s41561-020-0631-0>, 2020.

Ma, X. F., Zangmeister, C. D., Gigault, J., Mulholland, G. W. and Zachariah, M. R.: Soot aggregate restructuring during water processing, *Journal of Aerosol Science*, 66, 209–219, <https://doi.org/10.1016/j.jaerosci.2013.08.001>, 2013.

Mahrt, F., Marcolli, C., David, R. O., Grönquist, P., Barthazy Meier, E. J., Lohmann, U. and Kanji, Z. A.: Ice nucleation abilities of soot particles determined with the Horizontal Ice Nucleation Chamber, *Atmos. Chem. Phys.*, 18(18), 13363–13392, <https://doi.org/10.5194/acp-18-13363-2018>, 2018.

Mahrt, F., Kilchhofer, K., Marcolli, C., Grönquist, P., David, R. O., Rösch, M., Lohmann, U. and Kanji, Z. A.: The Impact of Cloud Processing on the Ice Nucleation Abilities of Soot Particles at Cirrus Temperatures, *Journal of Geophysical Research: Atmospheres*, 125(3), e2019JD030922, <https://doi.org/10.1029/2019JD030922>, 2020.

Mandelbrot, B. B.: *Fractals: form, chance, and dimension*, W.H. Freeman, San Francisco., 1977.

Park, K., Kittelson, D. B. and McMurry, P. H.: Structural properties of diesel exhaust particles measured by transmission electron microscopy (TEM): Relationships to particle mass and mobility, *Aerosol Science and Technology*, 38(9), 881–889, <https://doi.org/10.1080/027868290505189>, 2004.

Penner, J. E., Chen, Y., Wang, M. and Liu, X.: Possible influence of anthropogenic aerosols on cirrus clouds and anthropogenic forcing, *Atmospheric Chemistry and Physics*, 9(3), 879–896, <https://doi.org/10.5194/acp-9-879-2009>, 2009.

Schmidt-Ott, A., Baltensperger, U., Gaggeler, H. W. and Jost, D. T.: Scaling behavior of physical parameters describing agglomerates, *Journal of Aerosol Science*, 21(6), 711–717, [https://doi.org/10.1016/0021-8502\(90\)90037-x](https://doi.org/10.1016/0021-8502(90)90037-x), 1990.

Sorensen, C. M.: The Mobility of Fractal Aggregates: A Review, *Aerosol Science and Technology*, 45(7), 765–779, <https://doi.org/10.1080/02786826.2011.560909>, 2011.

Sullivan, S. C., Lee, D., Oreopoulos, L. and Nenes, A.: Role of updraft velocity in temporal variability of global cloud hydrometeor number, *PNAS*, 113(21), 5791–5796, <https://doi.org/10.1073/pnas.1514039113>, 2016.

Ullrich, R., Hoose, C., Möhler, O., Niemand, M., Wagner, R., Höhler, K., Hiranuma, N., Saathoff, H. and Leisner, T.: A New Ice Nucleation Active Site Parameterization for Desert Dust and Soot, *Journal of the Atmospheric Sciences*, 74(3), 699–717, <https://doi.org/10.1175/jas-d-16-0074.1>, 2017.

Wang, M. and Penner, J. E.: Cirrus clouds in a global climate model with a statistical cirrus cloud scheme, *Atmospheric Chemistry and Physics*, 10(12), 5449–5474, <https://doi.org/10.5194/acp-10-5449-2010>, 2010.

Weingartner, E., Burtcher, H. and Baltensperger, U.: Hygroscopic properties of carbon and diesel soot particles, *Atmospheric Environment*, 31(15), 2311–2327, [https://doi.org/10.1016/S1352-2310\(97\)00023-X](https://doi.org/10.1016/S1352-2310(97)00023-X), 1997.

- Weingartner, Ernest., Baltensperger, Urs. and Burtscher, Heinz.: Growth and Structural Change of Combustion Aerosols at High Relative Humidity, *Environ. Sci. Technol.*, 29(12), 2982–2986, <https://doi.org/10.1021/es00012a014>, 1995.
- Yuan, Q., Xu, J., Wang, Y., Zhang, X., Pang, Y., Liu, L., Bi, L., Kang, S. and Li, W.: Mixing State and Fractal Dimension of Soot Particles at a Remote Site in the Southeastern Tibetan Plateau, *Environ. Sci. Technol.*, 53(14), 8227–8234, <https://doi.org/10.1021/acs.est.9b01917>, 2019.
- Zhou, C. and Penner, J. E.: Aircraft soot indirect effect on large-scale cirrus clouds: Is the indirect forcing by aircraft soot positive or negative?, *Journal of Geophysical Research: Atmospheres*, 119(19), 11,303-11,320, <https://doi.org/10.1002/2014JD021914>, 2014.
- Zuberi, B., Johnson, K. S., Aleks, G. K., Molina, L. T., Molina, M. J. and Laskin, A.: Hydrophilic properties of aged soot, *Geophysical Research Letters*, 32(L01807), <https://doi.org/10.1029/2004GL021496>, 2005.
